# Supplementary material for: Effect of Morphological Characteristics and Biomineralization of 3D-Printed Gelatin/Hyaluronic Acid/Hydroxyapatite Composite Scaffolds on Bone Tissue Regeneration
Source: MDPI journal article supplement (doi:10.3390/ijms22136794), 2021-06-24
Supplement: s1 [file s1]

## Supplementary Information

### Effect of Morphological Characteristics and Biomineralization of 3D-Printed Gelatin/Hyaluronic acid/Hydroxyapatite Composite Scaffolds on Bone Tissue Regeneration

Jae-Woo Kim, Yoon Soo Han, Hyun Mee Lee, Jin-Kyung Kim, and Young-Jin Kim\*

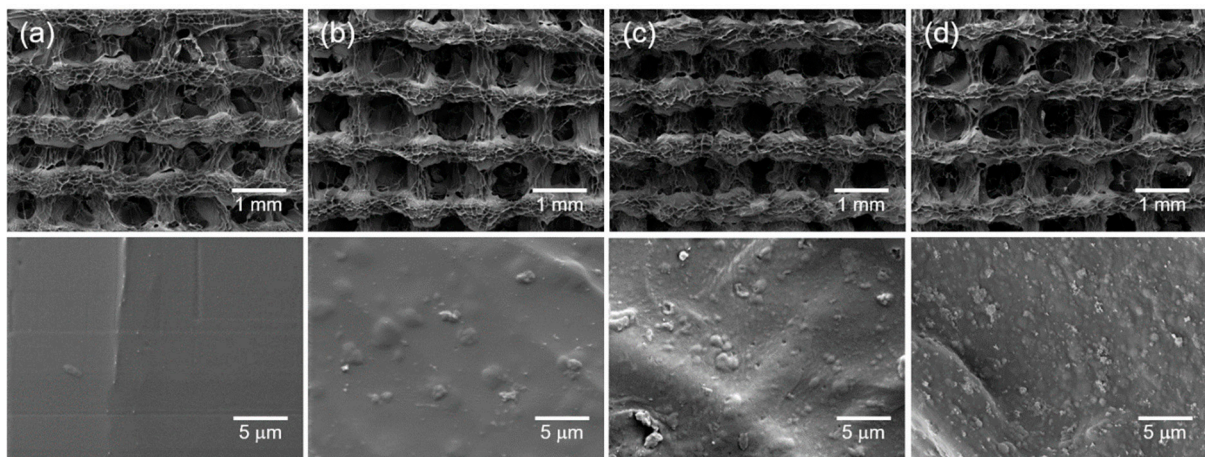

**Figure S1.** SEM images of (a) GEHA0, (b) GEHA10, (c) GEHA20, and (d) GEHA40 composite scaffolds.

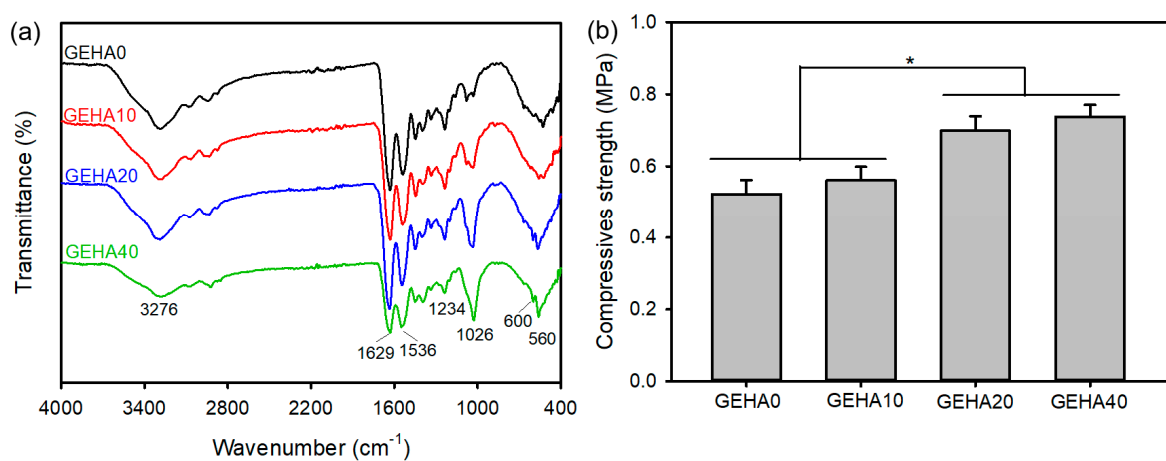

**Figure S2.** (a) FTIR spectra and (b) compressive strength of composite scaffolds containing different amount of HAp nanoparticles ( $n = 4$ ).
